# Supplementary material for: Reactive processing of formaldehyde and acetaldehyde in aqueous aerosol mimics: surface tension depression and secondary organic products
Source: Copernicus journal article supplement (doi:10.5194/acp-11-11617-2011), 2011-11-22
Supplement: Supplementary file 1 [file acp-11-11617-2011-supplement.pdf]

## Supporting Information

### Reactive processing of formaldehyde and acetaldehyde in aqueous aerosol mimics: Surface tension depression and secondary organic products

Zhi Li, Allison N. Schwier, Neha Sareen, V. Faye McNeill\*

Department of Chemical Engineering, Columbia University, New York, NY, 10027, USA

\* To whom correspondence should be addressed. Email: [yfm2103@columbia.edu](mailto:yfm2103@columbia.edu)

**Table S1.** Calculated errors between the Henning model predictions (using eq. (3)) and experimentally measured surface tension values.

| Total Organic Concentration | Species             | MG*                         | Acet* | Form* | Model Prediction        | Measured Data | Error  |
|-----------------------------|---------------------|-----------------------------|-------|-------|-------------------------|---------------|--------|
| (mol/L)                     |                     | (mol C/kg H <sub>2</sub> O) |       |       | (dyn cm <sup>-1</sup> ) |               | (%)    |
| 0.05                        | MG<br>Acet:Form=1:3 | 0.030                       | 0.020 | 0.030 | 73.848                  | 67.438        | 8.680  |
|                             |                     | 0.060                       | 0.015 | 0.022 | 69.730                  | 64.438        | 7.589  |
|                             |                     | 0.090                       | 0.010 | 0.015 | 66.454                  | 61.822        | 6.970  |
|                             |                     | 0.120                       | 0.005 | 0.007 | 63.712                  | 59.159        | 7.146  |
|                             | MG<br>Acet:Form=1:1 | 0.113                       | 0.013 | 0.006 | 64.832                  | 60.105        | 7.292  |
|                             |                     | 0.075                       | 0.025 | 0.012 | 68.868                  | 63.105        | 8.368  |
|                             |                     | 0.038                       | 0.038 | 0.019 | 73.673                  | 68.249        | 7.362  |
|                             | MG/Acet             | 0.038                       | 0.075 | N/A   | 75.081                  | 66.407        | 11.553 |
|                             |                     | 0.075                       | 0.051 | N/A   | 70.361                  | 62.575        | 11.066 |
|                             |                     | 0.113                       | 0.025 | N/A   | 65.746                  | 60.465        | 8.032  |
| 0.5                         | MG/Acet             | 1.153                       | 0.259 | N/A   | 55.433                  | 47.388        | 14.512 |
|                             |                     | 0.770                       | 0.518 | N/A   | 62.788                  | 50.389        | 19.747 |
|                             |                     | 0.385                       | 0.778 | N/A   | 70.895                  | 54.454        | 23.190 |
|                             | MG/Form             | 1.148                       | N/A   | 0.126 | 51.809                  | 48.046        | 7.263  |
|                             |                     | 0.763                       | N/A   | 0.252 | 55.868                  | 50.638        | 9.361  |
|                             |                     | 0.381                       | N/A   | 0.377 | 62.142                  | 56.334        | 9.346  |

\*MG: Methylglyoxal; Acet: Acetaldehyde; Form: Formaldehyde

### Density functional theory calculations of paraformaldehyde ionization by I

Density functional theory calculations were used to evaluate the thermodynamic favorability of the following chemical ionization reaction for paraformaldehyde ( $n = 9$ ):

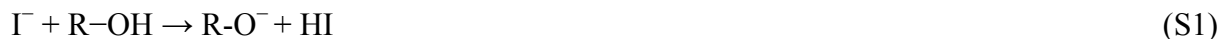

Geometry optimizations and energy calculations were performed using Jaguar 7.7 (Schrödinger, Inc.). The B3LYP functional was used with the ERMLER2 basis set, which allows the treatment of iodine via the use of effective core potentials (Lajohn et al., 1987). The results of the calculation are shown in Table S2. We found that reaction S1 is thermodynamically favorable, with  $\Delta G = -4.99 \text{ kJ mol}^{-1}$ . We believe that the ionized species is stabilized by interactions between the ionized  $\text{O}^-$  and the other terminal hydroxyl group(s) on the molecule (see the optimized geometry in Figure S1).

**Table S2.** Calculated total Gibbs free energy.

| Species                              | Gtot (Hartrees) |
|--------------------------------------|-----------------|
| I-                                   | -111.5214881    |
| Paraformaldehyde ( $n= 9$ )          | -1106.4844260   |
| Ionized paraformaldehyde ( $n = 9$ ) | -1105.9625590   |
| HI                                   | -112.0452540    |

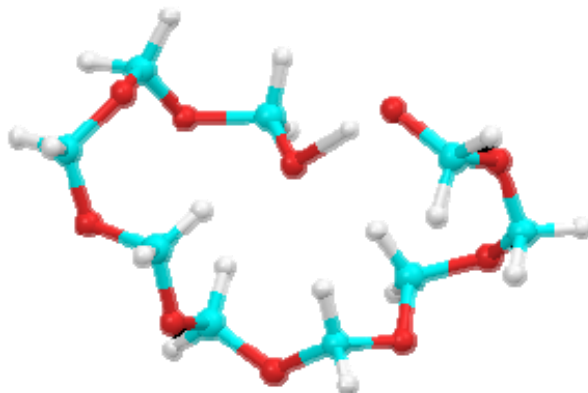

**Figure S1.** Optimized structure of ionized paraformaldehyde ( $n = 9$ ). White = H, red = O, cyan = C.

**Table S3.** Proposed peak assignments for Aerosol-CIMS mass spectra with  $\text{H}_3\text{O}^+$  of atomized solutions of 1 M formaldehyde in 3.1 M AS.

| m/z (amu)<br>$\pm 1.0$ amu | Ion Formula                                                                                                                 | Molecular Formula                                                    | Possible Structures | Mechanism  |
|----------------------------|-----------------------------------------------------------------------------------------------------------------------------|----------------------------------------------------------------------|---------------------|------------|
| 77.2                       | $\text{C}_2\text{H}_5\text{O}_3^+$                                                                                          | $\text{C}_2\text{H}_4\text{O}_3$                                     |                     | hemiacetal |
| 94.9                       | $\text{C}_2\text{H}_5\text{O}_3^+ \cdot \text{H}_2\text{O}$                                                                 | $\text{C}_2\text{H}_4\text{O}_3$                                     |                     | hemiacetal |
|                            | $\text{C}_2\text{H}_7\text{O}_4^+$                                                                                          | $\text{C}_2\text{H}_6\text{O}_4$                                     |                     |            |
| 107                        | $\text{C}_3\text{H}_7\text{O}_4^+$                                                                                          | $\text{C}_3\text{H}_6\text{O}_4$                                     |                     | hemiacetal |
| 113.2                      | $\text{C}_2\text{H}_5\text{O}_3^+ \cdot 2\text{H}_2\text{O}$                                                                | $\text{C}_2\text{H}_4\text{O}_3$                                     |                     | hemiacetal |
|                            | $\text{C}_2\text{H}_7\text{O}_4^+ \cdot \text{H}_2\text{O}$                                                                 | $\text{C}_2\text{H}_6\text{O}_4$                                     |                     |            |
| 124.9                      | $\text{C}_3\text{H}_7\text{O}_4^+ \cdot \text{H}_2\text{O}$<br>$\text{C}_3\text{H}_9\text{O}_5^+$                           | $\text{C}_3\text{H}_6\text{O}_4$<br>$\text{C}_3\text{H}_8\text{O}_5$ |                     | hemiacetal |
| 137                        | $\text{C}_4\text{H}_9\text{O}_5^+$                                                                                          | $\text{C}_4\text{H}_8\text{O}_5$                                     |                     | hemiacetal |
| 143.5                      | $\text{C}_3\text{H}_7\text{O}_4^+ \cdot 2\text{H}_2\text{O}$<br>$\text{C}_3\text{H}_9\text{O}_5^+ \cdot \text{H}_2\text{O}$ | $\text{C}_3\text{H}_6\text{O}_4$<br>$\text{C}_3\text{H}_8\text{O}_5$ |                     | hemiacetal |

**Table S4.** Proposed peak assignments for Aerosol-CIMS mass spectra with  $\text{H}_3\text{O}^+$  of atomized solutions of 0.5 M formaldehyde/MG (1:1) in 3.1 M AS.

| m/z (amu)<br>$\pm 1.0$ amu | Ion Formula                                                 | Molecular Formula                | Possible Structures | Mechanism      |
|----------------------------|-------------------------------------------------------------|----------------------------------|---------------------|----------------|
| 84.3                       | $\text{CH}_3\text{O}_2^+ \cdot 2\text{H}_2\text{O}$         | $\text{CH}_2\text{O}_2$          |                     | Formic Acid    |
|                            | $\text{CH}_5\text{O}_2^+ \cdot 2\text{H}_2\text{O}$         | $\text{CH}_4\text{O}_2$          |                     | Hydrated F     |
| 96.1                       | $\text{C}_2\text{H}_5\text{O}_3^+ \cdot \text{H}_2\text{O}$ | $\text{C}_2\text{H}_4\text{O}_3$ |                     | hemiacetal     |
| 125.1                      | $\text{C}_3\text{H}_7\text{O}_4^+ \cdot \text{H}_2\text{O}$ | $\text{C}_3\text{H}_6\text{O}_4$ |                     | hemiacetal     |
| 154.9                      | $\text{C}_4\text{H}_9\text{O}_5^+ \cdot \text{H}_2\text{O}$ | $\text{C}_4\text{H}_8\text{O}_5$ |                     | n=4 hemiacetal |

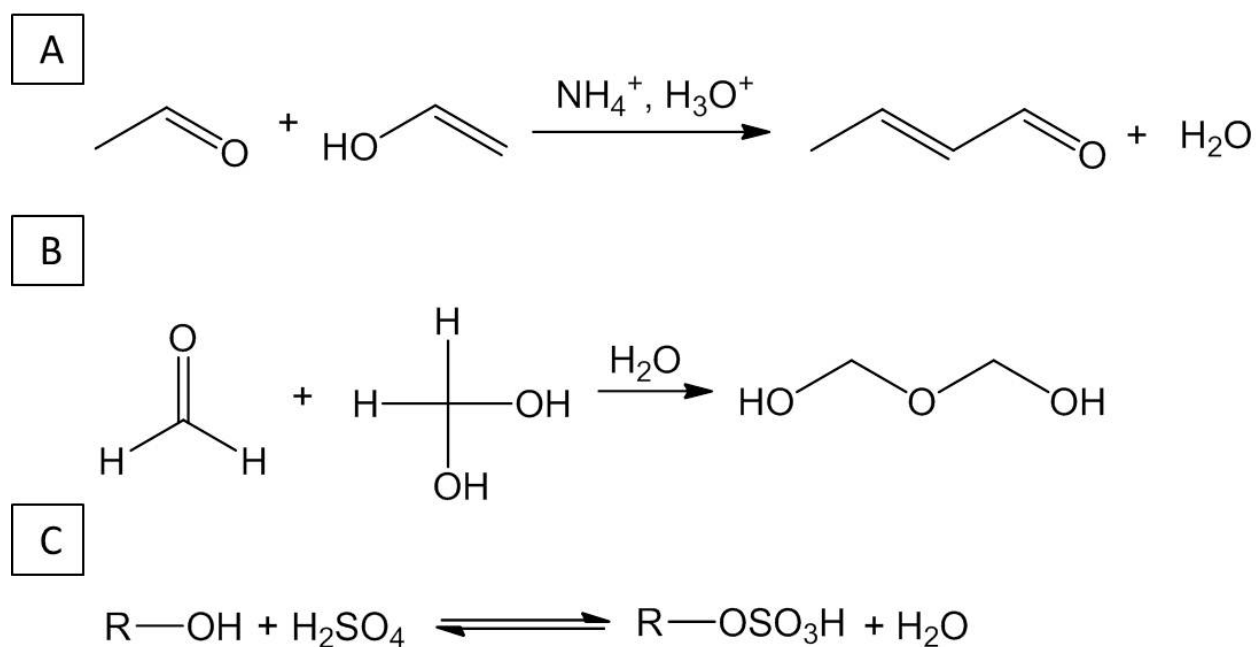

**Figure S2.** Main reaction pathways of A) aldol condensation catalyzed by  $\text{NH}_4^+$  or  $\text{H}_3\text{O}^+$ ; B) hemiacetal formation; C) alcohol sulfate ester formation.

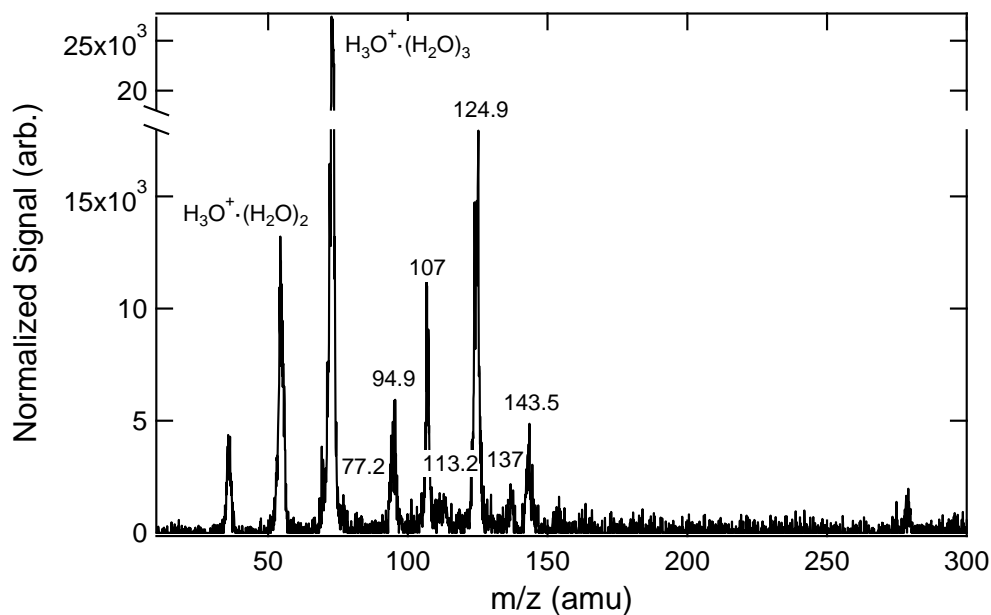

**Figure S3.** Aerosol CIMS spectra of atomized solutions of 1 M formaldehyde in 3.1 M AS. See the text for details of sample preparation and analysis. Positive-ion mass spectrum obtained using  $\text{H}_3\text{O}^+(\text{H}_2\text{O})_n$  as the reagent ion.

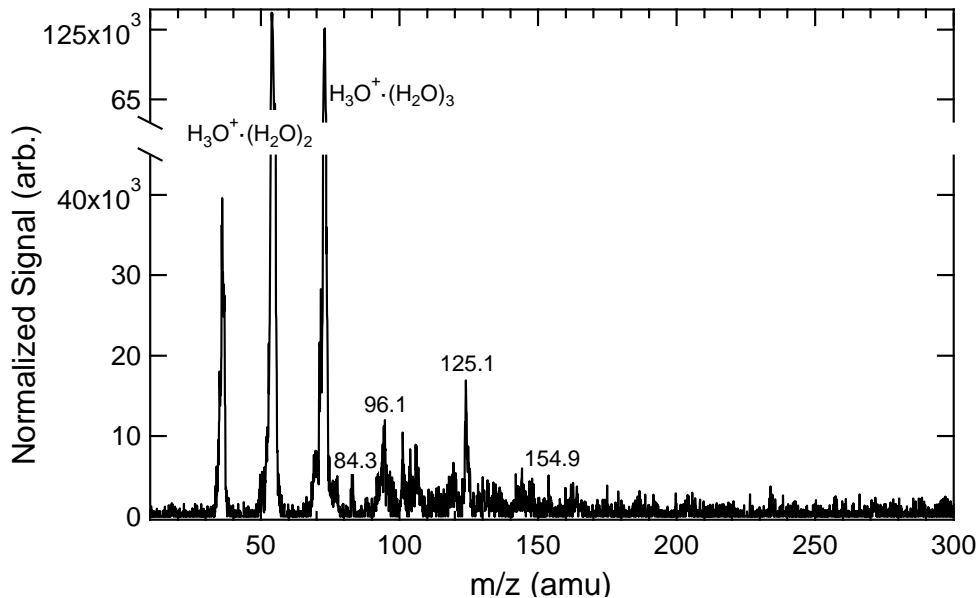

**Figure S4.** Aerosol CIMS spectra of atomized solutions of 0.5 M formaldehyde/MG (1:1) in 3.1 M AS. See the text for details of sample preparation and analysis. Positive-ion mass spectrum with H<sub>3</sub>O<sup>+</sup>·(H<sub>2</sub>O)<sub>n</sub> as the reagent ion.

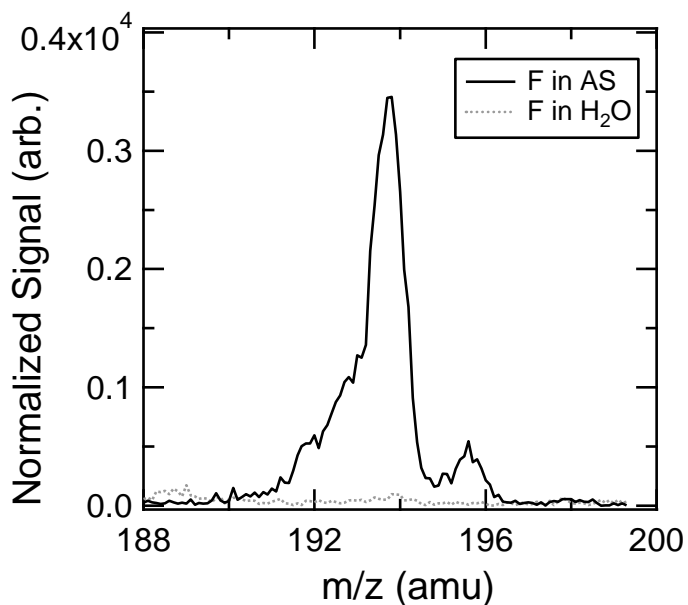

**Figure S5.** Aerosol CIMS spectra showing a closeup of the possible organosulfate peak (m/z 193.8) identified in the 0.2 M formaldehyde in 3.1 M AS solution in negative-ion mode. The satellite peak (m/z 195.6) is also visible.

### **Predictions of paraformaldehyde sulfate ester production**

We attribute the signal at 193.8 amu in the formaldehyde/AS spectrum to an organosulfate derived from the formaldehyde hemiacetal dimer ( $C_2H_6O_6S$ ). After 24 h of reaction, the mass spectrum shows signal of 3500 counts/s at this mass. Assuming an upper bound sensitivity of  $100 \text{ counts s}^{-1} \text{ ppt}^{-1}$  for this species (Sareen et al., 2010), and based on the volume weighted geometric mean diameter of  $414(\pm 14) \text{ nm}$  and the average particle concentration of  $\sim 4 \times 10^4 \text{ cm}^{-3}$ , we estimate a lower limit for the in-particle concentration of this species to be  $\sim 10^{-3} \text{ M}$ . Taking into account the concentrating effect of aerosol dehydration after atomization and dilution of the aerosol stream with dry  $N_2$ , we infer a  $C_2H_6O_6S$  concentration of  $\geq 2 \times 10^{-4} \text{ M}$  in the bulk solution after 24 h of reaction.

According to Deno and Newman the formation of alcohol ester sulfates occurs via the reaction with  $H_2SO_4$ , not  $SO_4^{-2}$  or  $HSO_4^-$  (Deno and Newman, 1950). We assume here that the same is true for the formation of  $C_2H_6O_6S$  from  $C_2H_6O_3$ . Minerath and coworkers reported that sulfate esterification of ethylene glycol, a close structural analog of  $C_2H_6O_3$ , occurred in 75 wt%  $H_2SO_4$  according to:

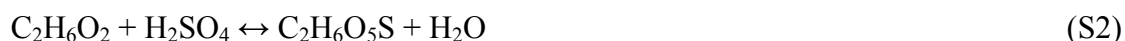

with a forward pseudo-first-order rate constant of  $7.30 \times 10^{-4} \text{ s}^{-1}$  and reverse pseudo-first-order rate constant of  $3.00 \times 10^{-4} \text{ s}^{-1}$  (Minerath et al., 2008). This translates to a forward second-order rate constant of  $6.29 \times 10^{-5} \text{ M}^{-1} \text{ s}^{-1}$  and reverse second-order rate constant of  $1.43 \times 10^{-5} \text{ M}^{-1} \text{ s}^{-1}$ .

The following reaction was modeled using POLYMATH 6.10:

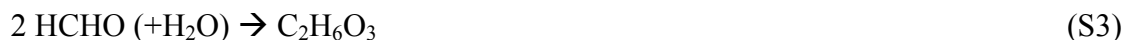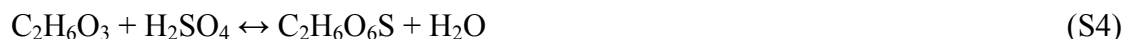

With  $k_{S4} = 6.29 \times 10^{-5} \text{ M}^{-1} \text{ s}^{-1}$  and  $k_{-S4} = 1.43 \times 10^{-5} \text{ M}^{-1} \text{ s}^{-1}$ . Formaldehyde dimerization is assumed to be fast, with a rate constant similar to glyoxal dimerization (pseudo first-order rate constant =  $5 \times 10^{-4} \text{ s}^{-1}$  (Fratzke and Reilly, 1986)). We found that the model was insensitive to this parameter, because reaction (S4) was rate-limiting. Based on this model we predict a maximum  $C_2H_6O_6S$  concentration of  $\sim 7 \times 10^{-8} \text{ M}$  after 24 h of reaction. This calculation provides an upper bound estimate of  $C_2H_6O_6S$  concentration since other sinks for formaldehyde monomer and  $C_2H_6O_3$

exist in the system which are not represented by this simple model. Nevertheless, this model underpredicts the observed  $C_2H_6O_6S$  concentration by a factor of  $\geq 3000$ . This disagreement between model and experiment suggests that either a) the kinetics of sulfate esterification for paraformaldehyde are significantly faster than for alcohols b)  $SO_4^{2-}$  or  $HSO_4^-$  is the active reactant, contrary to the conclusions of Deno and Newman, or c) sulfate esterification is enhanced by the solution dehydration that accompanies the atomization and volatilization steps in our detection technique.

## REFERENCES

- Deno, N. C. and Newman, M. S.: Mechanism of Sulfation of Alcohols, *J. Am. Chem. Soc.*, 72 (9), 3852-3856, 1950.
- Fratzke, A. R. and Reilly, P. J.: Thermodynamic and Kinetic Analysis of the Dimerization of Aqueous Glyoxal, *Int. J. Chem. Kinetics*, 18, 775-789, 1986.
- Lajohn, L. A., Christiansen, P. A., Ross, R. B., Atashroo, T., and Ermler, W. C.: Abinitio Relativistic Effective Potentials with Spin Orbit Operators .3. Rb Through Xe, *J. Chem. Phys.*, 87 (5), 2812-2824, 1987.
- Minerath, E. C., Casale, M. T., and Elrod, M. J.: Kinetics feasibility study of alcohol sulfate esterification reactions in tropospheric aerosols, *Environ. Sci. Technol.*, 42 (12), 4410-4415, 2008.
- Sareen, N., Schwier, A. N., Shapiro, E. L., Mitroo, D. M., and McNeill, V. F.: Secondary organic material formed by methylglyoxal in aqueous aerosol mimics, *Atmos. Chem. Phys.*, 10, 997-1016, 2010.
